# Supplementary material for: New findings and current controversies on oxidation of benzyl alcohol by a copper complex
Source: Royal Society of Chemistry journal article supplement (doi:10.1039/d0ma00222d), 2020-01-01
Supplement: d0ma00222d1.pdf [file d0ma00222d1.pdf]

# Electronic Supplementary Information

# New findings and current controversies on oxidation of benzyl alcohol by a copper complex

Zahra Zand,<sup>a</sup> Jitendra Pal Singh,<sup>b</sup> Robabeh Bagheri,<sup>c</sup> Junfeng Cui,<sup>d,e</sup> Keun Hwa Chae,<sup>b</sup> Zhenlun Song<sup>c</sup> and Mohammad Mahdi Najafpour<sup>a, f, g\*</sup>

<sup>a</sup>*Department of Chemistry, Institute for Advanced Studies in Basic Sciences (IASBS), Zanjan, 45137-66731, Iran*

<sup>b</sup>*Advanced Analysis Center, Korea Institute of Science and Technology (KIST), Seoul 02792, Republic of Korea*

<sup>c</sup>*Key Laboratory of Marine Materials and Related Technologies, Ningbo Institute of Materials Technology and Engineering, Chinese Academy of Sciences, Ningbo 315201, China*

<sup>d</sup>*Key Laboratory for Precision and Non-Traditional Machining Technology of Ministry of Education, Dalian University of Technology, Dalian 116024, China*

<sup>e</sup>*Surface Protection Research Group, Surface Department, Ningbo Institute of Materials Technology and Engineering, Chinese Academy of Sciences, 519 Zhuangshi Road, Ningbo 315201, China*

<sup>f</sup>*Center of Climate Change and Global Warming, Institute for Advanced Studies in Basic Sciences (IASBS), Zanjan, 45137-66731, Iran*

<sup>g</sup>*Research Center for Basic Sciences & Modern Technologies (RBST), Institute for Advanced Studies in Basic Sciences (IASBS), Zanjan 45137-66731, Iran*

*\*Corresponding author; Phone: (+98) 24 3315 3201; E-mail: [mmnajafpour@iasbs.ac.ir](mailto:mmnajafpour@iasbs.ac.ir)*

## **Experimental**

### **Materials and methods**

All reagents and solvents were purchased from the commercial sources and were used without a further purification: 1,10-Phenanthroline monohydrate (Sigma-Aldrich),  $\text{Cu}(\text{ClO}_4)_2 \cdot 6\text{H}_2\text{O}$  (Sigma-Aldrich) and acetonitrile (Merck).

Scanning electron microscopy (SEM) and transmission electron microscopy (TEM) were carried out with LEO 1430VP and Philips CM30 devices, respectively. The X-ray powder patterns were recorded with a Bruker D8 ADVANCE diffractometer ( $\text{CuK}_\alpha$  radiation).

X-ray absorption spectra of these materials at Cu K-edge were measured at 1D XRS KIST-PAL beamline at Pohang Light Source (PLS, Pohang, Republic of Korea), operating at 3.0 GeV with a storage current of 300 mA. The beamline is a bending magnet X-ray Scattering (XRS) beamline which uses an Si(111) double crystal monochromator to give a wide range of monochromatic energies (4–16 keV). To measure XANES spectra of these materials, higher harmonics were removed by detuning incident beam intensity upto 60% of maximum intensity. Three ionization chambers filled with He and  $\text{N}_2$  gases were used to record the intensity of the incident and the transmitted X-rays, respectively. The materials are placed between the first and second ionization chamber, while a reference foil (Cu) for energy calibration is placed between the second and third ionization chamber. Under stationary conditions, XANES measurements were performed for the

Cu K-edge in a step scanning mode. Fourier transform infrared (FTIR) spectra were recorded using the Bruker FT-IR spectrometer. A sample pellet was prepared with mixture of collected solid and KBr.

After 90 minutes under reaction, the mixture was filtered, and the solid was washed 4 times with DI water and then particles were removed by the centrifuge. The collected solid was dried in 50 °C. For measurement DLS, the collected solid sonicated in water for 15 min, and DLS measurements were carried out at 25.0 °C by using a Malvern DLS instrument.

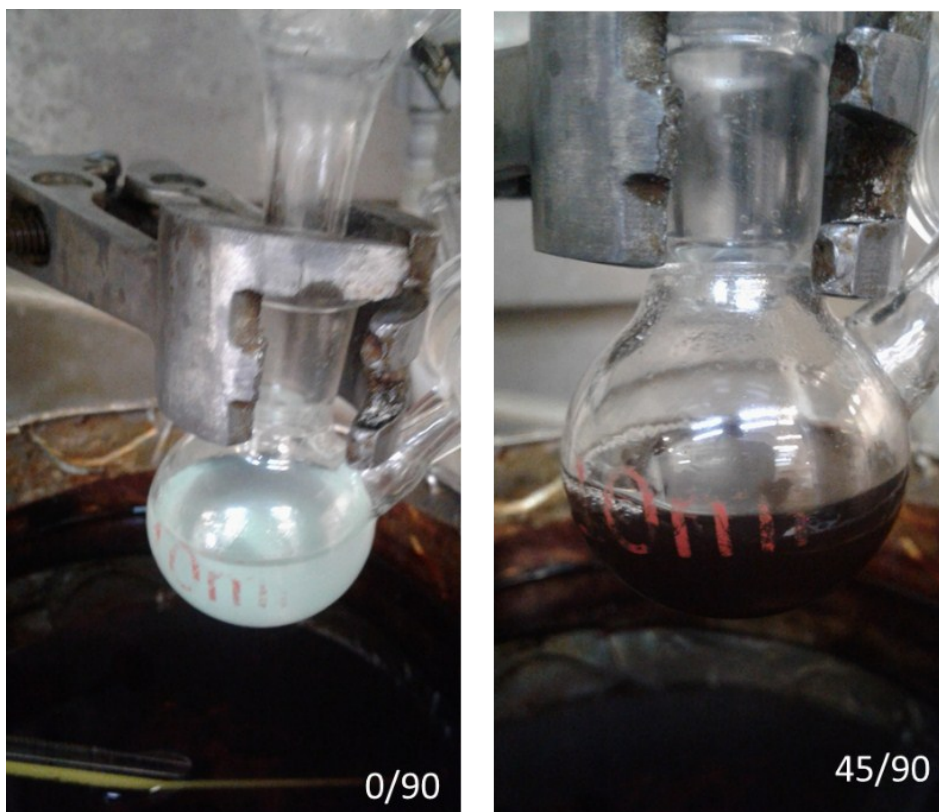

Fig. S1 Color changes during the reaction. Reagents and conditions: **1** (5% mmol), benzylalcohol (1 mmol),  $K_2CO_3$  (2 eq) temperature (80 °C), Toluene (5 ml), and under  $O_2$ .

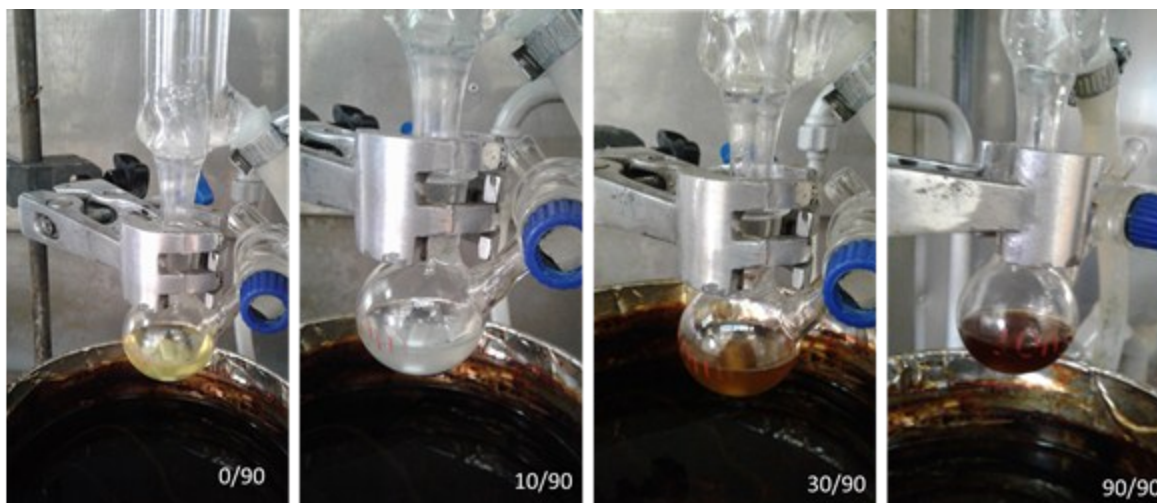

Fig. S2 Color changes during 90 minutes. Reagents and conditions: CuCl (5% mmol), 1, 10 phenantroline (%5), DIAD (%5) benzylalchole (1 mmol),  $K_2CO_3$  (2 eq), temperature (80 °C), and Toluene (5 ml) under  $O_2$ .

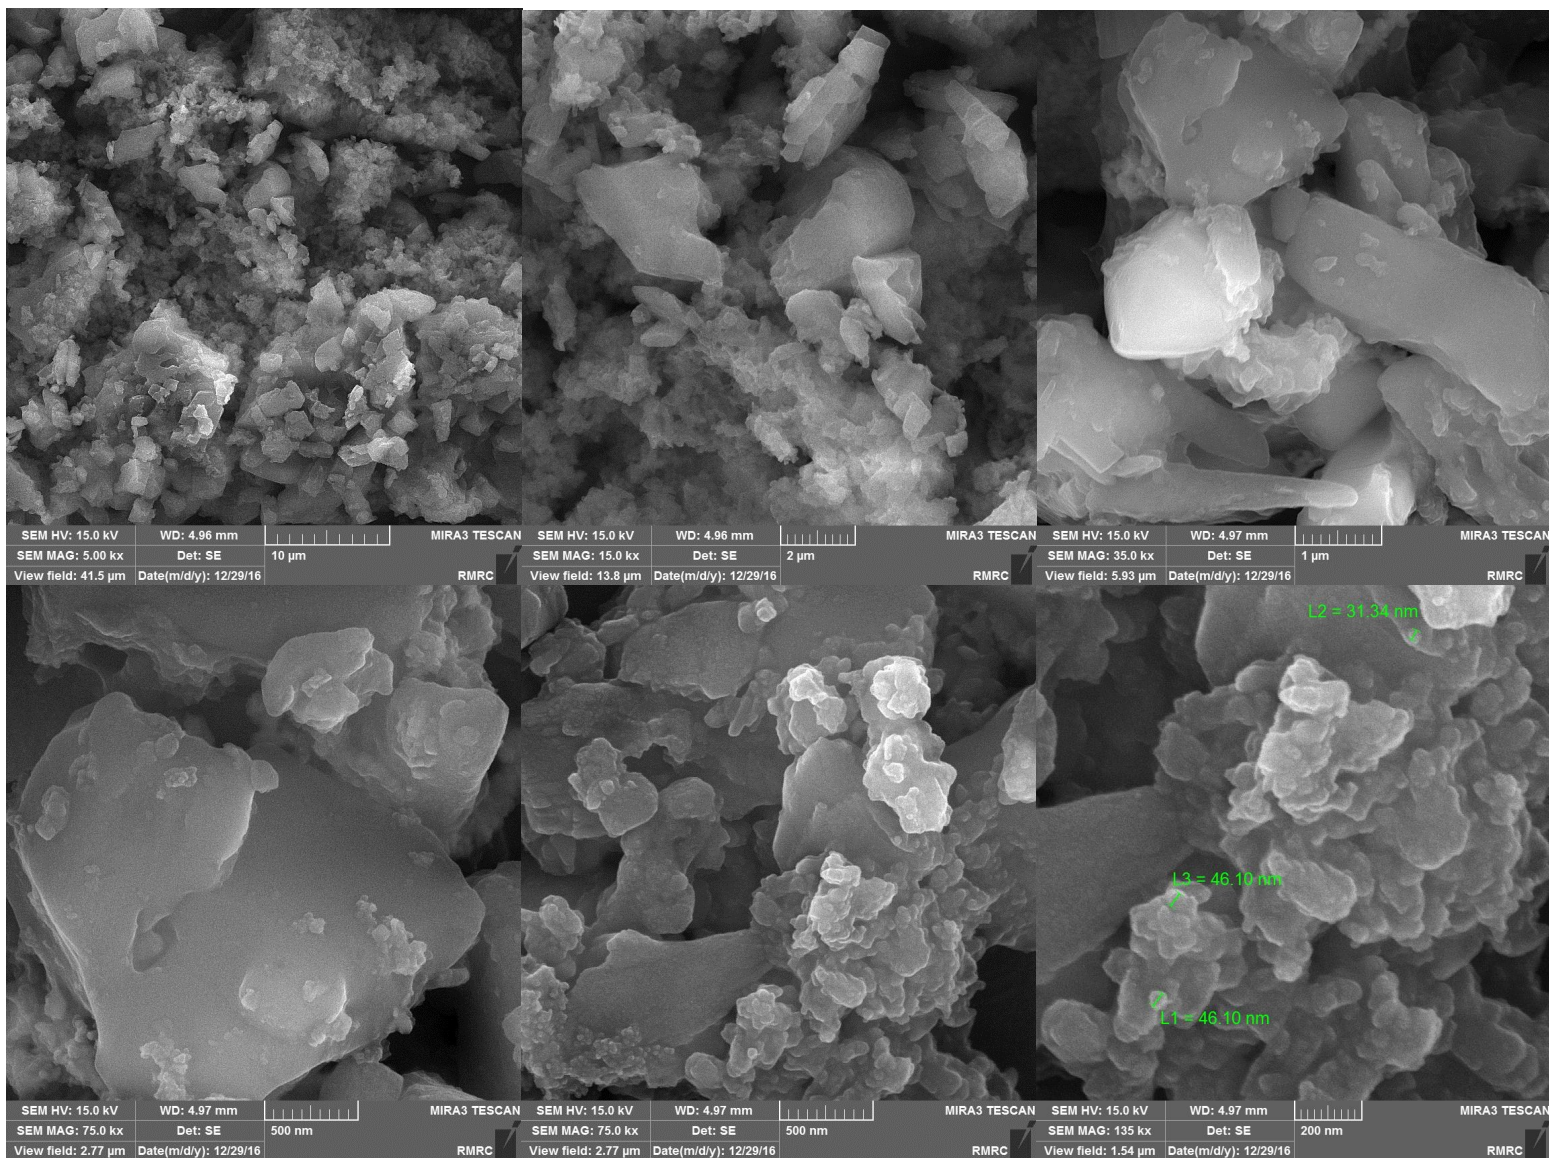

Fig. S3 SEM images of the centrifuged particles from the reaction of **1** under Marko's conditions.

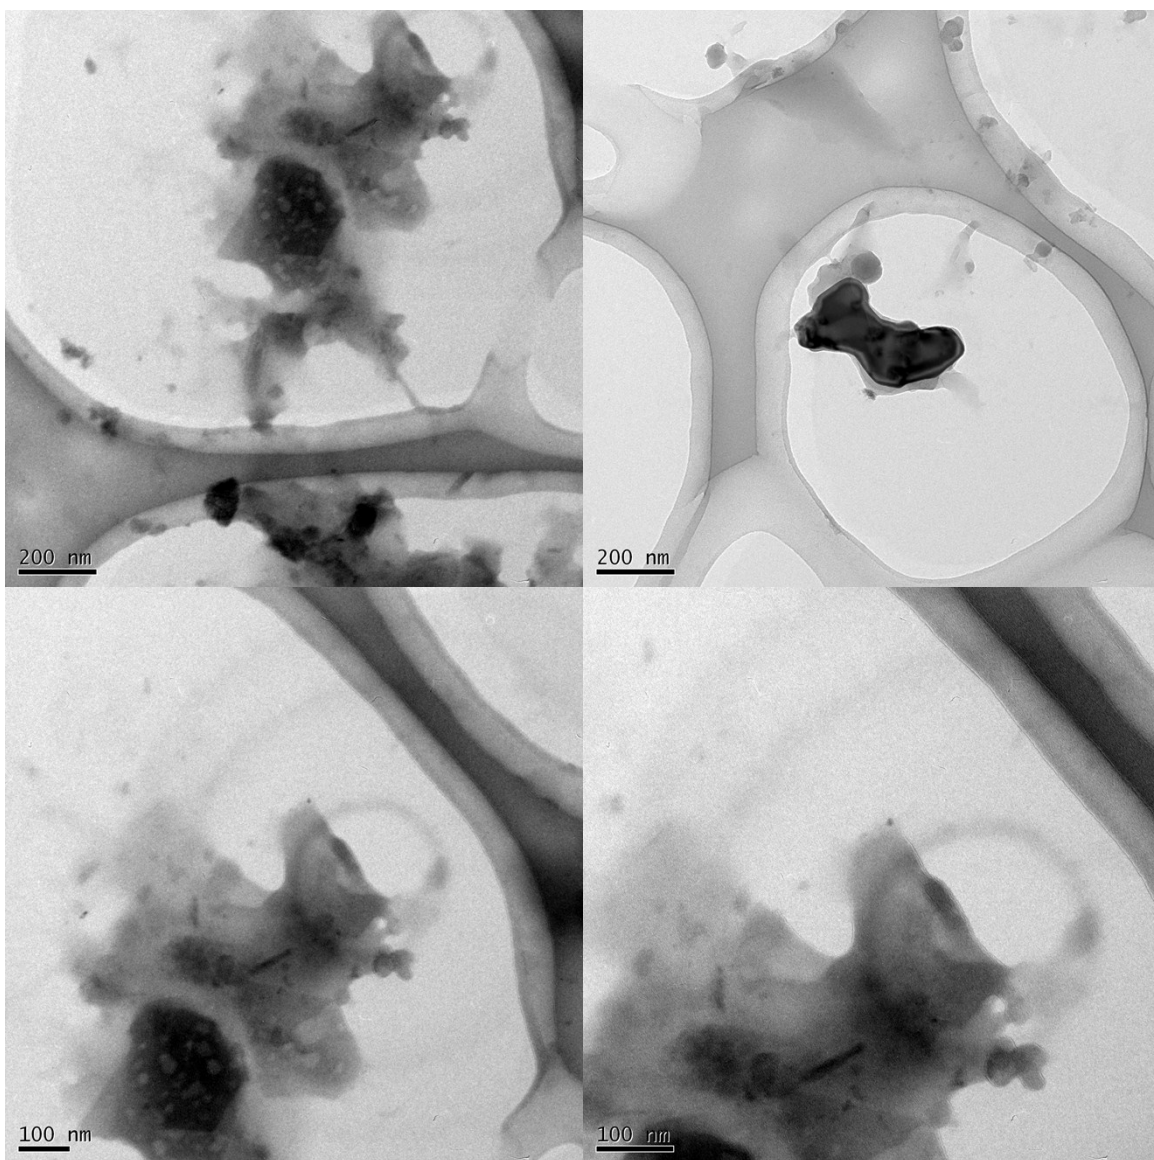

Fig. S4 TEM images of the centrifuged particles from the reaction of **1** under Marko's conditions.



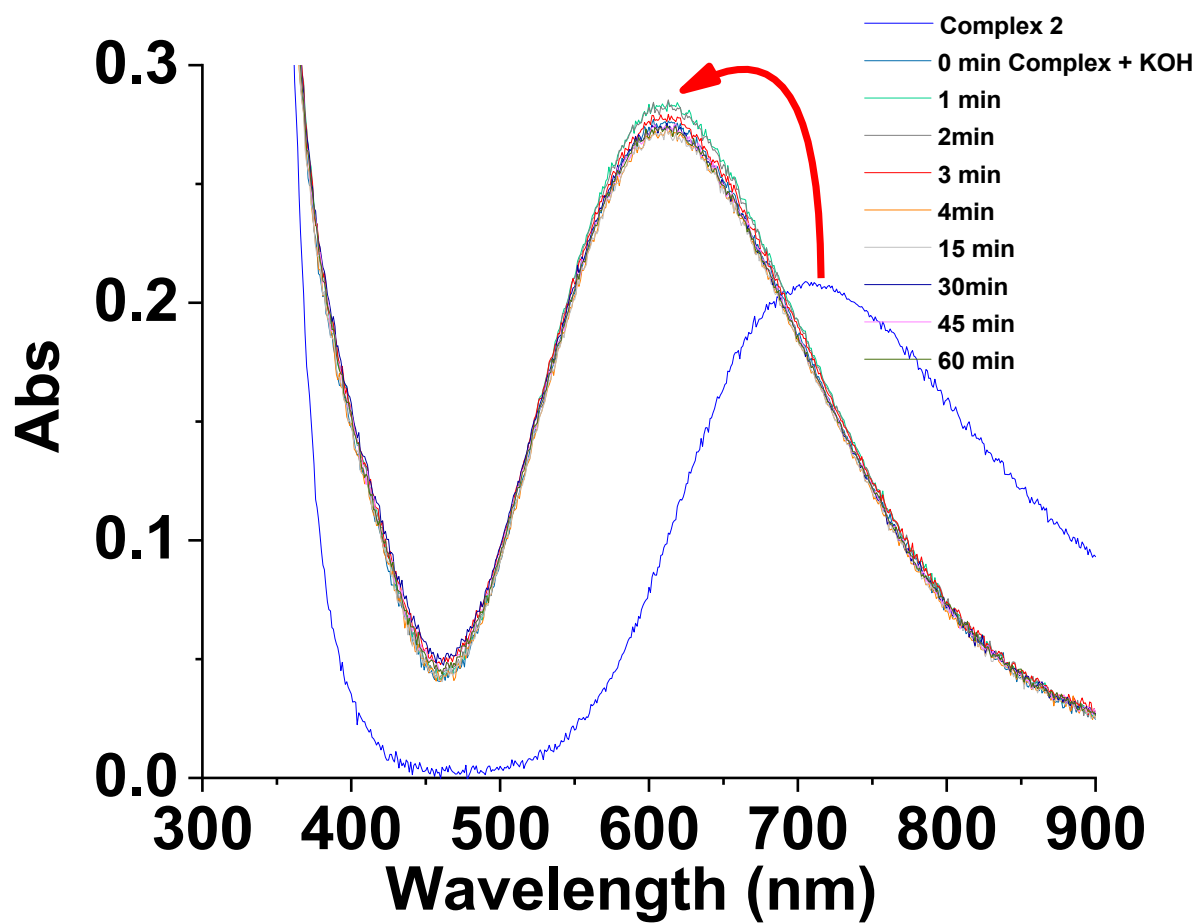

Fig. S5 UV-Vis spectroscopy of **2** (3.0 mM) before and after adding KOH (the final concentration is 2.0 M).

**Table S1** benzyl alcohol oxidation by the catalyst, and the centrifuged nanoparticles from the reaction

| Entry | Catalyst                                       | Benzyl alcohol (%) | Benzaldehyde (%) | Condition                                                                            |
|-------|------------------------------------------------|--------------------|------------------|--------------------------------------------------------------------------------------|
| 1     | CuCl                                           | 22                 | 78               | 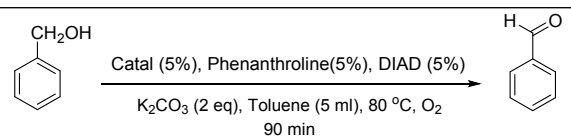   |
| 2     | CuO                                            | 99-95              | 1-5              |    |
| 3     | CuO                                            | 99-95              | 1-5              |    |
| 4     | Complex (2)                                    | 99-95              | 1-5              |    |
| 5     | Complex (1)                                    | 75                 | 25               |  |
| 6     | centrifuged solid from the reaction of entry 1 | 62                 | 38               |  |
| 7     | Cu(ClO <sub>4</sub> ) <sub>2</sub>             | 85                 | 15               |  |
| 8     | CuCl                                           | 99-95              | 1-5              |  |
| 9     | CuI                                            | 99-95              | 1-5              |  |
| 10    | CuI                                            | 22                 | 78               |  |

|    |                 |       |     |  |
|----|-----------------|-------|-----|--|
| 11 | $K_2Cu(CO_3)_2$ | 99-95 | 1-5 |  |
| 12 | $K_2Cu(CO_3)_2$ | 99-95 | 1-5 |  |
| 13 | $CuCO_3$        | 99-95 | 1-5 |  |
| 14 | $CuCO_3$        | 99-95 | 1-5 |  |
